# Supplementary material for: FACT modulates the conformations of histone H2A and H2B N-terminal tails within nucleosomes
Source: PubMed Central journal article supplement (PMC9376062; doi:10.1038/s42003-022-03785-z), 2022-08-13
Supplement: 42003_2022_3785_MOESM3_ESM.pdf [file 42003_2022_3785_MOESM3_ESM.pdf]

## Description of Additional Supplementary Files

**File name:** Supplementary Data 1

**Description:** The source data in Figs. 4d, 5c, and 6c.
